# Supplementary material
Source: PubMed Central journal article supplement (PMC7484060)
Supplement: NIHMS1615940-supplement-3.pdf [file NIHMS1615940-supplement-3.pdf]

1 ***Supplementary Information***

2

3 **Membrane insertion exacerbates the  $\alpha$ -Synuclein-Cu(II) dopamine oxidase activity: metallothionein-3**  
4 **targets and silences all  $\alpha$ -Synuclein-Cu(II) complexes**

5

6 Jenifer Calvo<sup>1</sup>, Neha Mulpuri<sup>1</sup>, Alex Dao<sup>1</sup>, Nabeeha Qazi<sup>1</sup>, Gabriele Meloni<sup>1</sup>

7

8 <sup>1</sup>Department of Chemistry and Biochemistry, The University of Texas at Dallas, Richardson, TX 75080,  
9 USA; e-mail: gabriele.meloni@utdallas.edu

10

11

12

13

14

15

16

17

18

19

20

21

22

23

24

25

26

27

28

29

30

31

32

33

34

35

36

37

38

39

40

41

Supplementary Figures

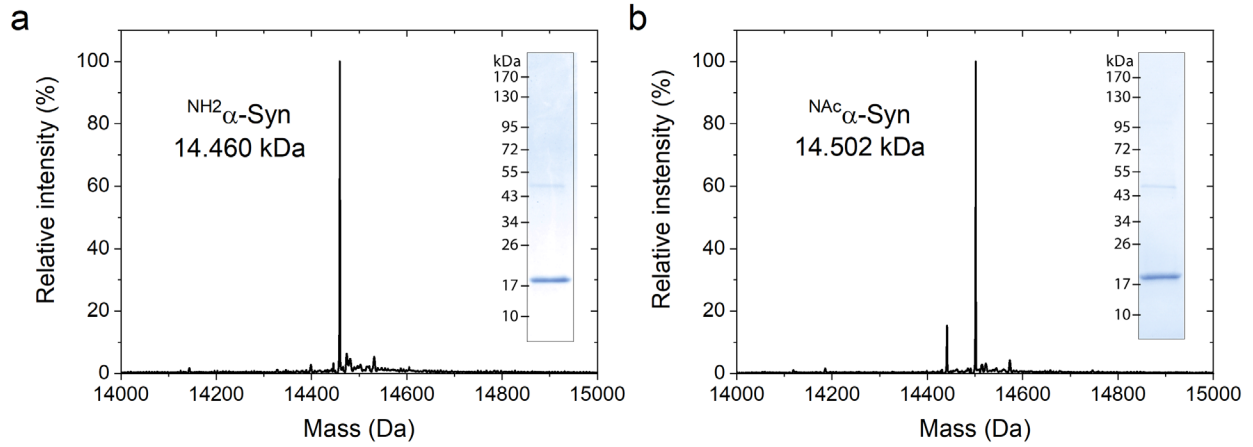

42

43 **Figure S1.** Intact protein mass spectra of purified  $\text{NH}_2\text{-}\alpha\text{-Syn}$  (a) and  $\text{NAc-}\alpha\text{-Syn}$  (b). Insets: SDS-PAGE of the  
44 corresponding purified proteins.

45

46

47

48

49

50

51

52

53

54

55

56

57

58

59

60

61

62

63

64

65

66

67

68

69

70

71

72

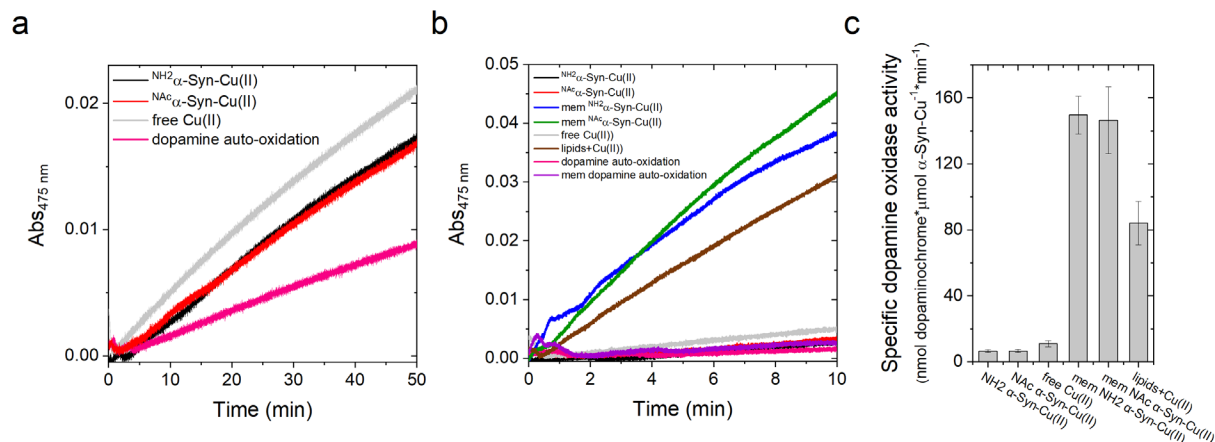

73  
 74 **Figure S2.** Kinetic traces at 475 nm monitoring dopaminochrome formation upon the reaction of soluble  
 75  $\text{NH}_2\alpha\text{-Syn-Cu(II)}$  (10  $\mu\text{M}$ ; black),  $\text{NAc}\alpha\text{-Syn-Cu(II)}$  (10  $\mu\text{M}$ ; red), and free  $\text{Cu(II)}$  (10  $\mu\text{M}$ ; gray) with dopamine  
 76 (2 mM). Dopamine (2 mM) auto-oxidation is shown in pink. (b) Kinetic traces at 475 nm to monitor  
 77 dopaminochrome formation upon the reaction of soluble and membrane-bound  $\text{NH}_2\alpha\text{-Syn-Cu(II)}$  (10  $\mu\text{M}$ ;  
 78 black and blue, respectively) and  $\text{NAc}\alpha\text{-Syn-Cu(II)}$  (10  $\mu\text{M}$ ; red and green, respectively) with dopamine (2  
 79 mM). The kinetic traces upon reaction of free  $\text{Cu(II)}$  and  $\text{Cu(II)}$  in lipids are shown in gray and brown,  
 80 respectively. Dopamine (2 mM) auto-oxidation in buffer and in the presence of lipids are shown in pink  
 81 and purple, respectively. (c) Specific dopamine oxidase activities determined by quantifying the  
 82 dopaminochrome formed after the reaction of  $\alpha\text{-Syn-Cu(II)}$  (10  $\mu\text{M}$ ) or free  $\text{Cu(II)}$  (10  $\mu\text{M}$ ) with dopamine  
 83 (2mM), for 10 min for soluble forms and 2 min for membrane-bound forms ( $\epsilon_{475}=3,700 \text{ M}^{-1}\text{cm}^{-1}$ ).  
 84 Calculated specific dopamine oxidase activities in  $\text{nmol dopaminochrome} \cdot \mu\text{mol } \alpha\text{-Syn-Cu(II)}^{-1} \cdot \text{min}^{-1}$ :  $\text{NH}_2\alpha\text{-}$   
 85  $\text{Syn-Cu(II)}$ :  $6.5 \pm 0.8$ ;  $\text{NAc}\alpha\text{-Syn-Cu(II)}$ :  $6.6 \pm 0.9$ ; free  $\text{Cu(II)}$ :  $10.9 \pm 1.9$ ; mem  $\text{NH}_2\alpha\text{-Syn-Cu(II)}$ :  $149.6 \pm 11.5$ ;  
 86 mem  $\text{NAc}\alpha\text{-Syn-Cu(II)}$ :  $146.4 \pm 20.2$ ; lipids+ $\text{Cu(II)}$ :  $84.1 \pm 13.2$ .

87  
 88  
 89

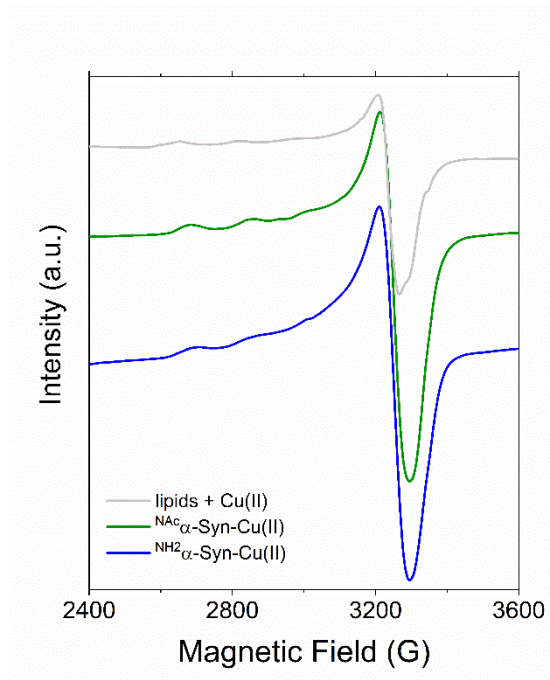

90

91 **Figure S3.** EPR spectra of membrane-bound  $\text{NH}_2\alpha\text{-Syn-Cu(II)}$  (blue),  $\text{NAC}\alpha\text{-Syn-Cu(II)}$  (green), or Cu(II) in lipids  
 92 (gray) (500  $\mu\text{M}$ ) in 20 mM N-ethylmorpholine pH 7.4 and 25% (v/v) glycerol, recorded at 10 K using  $\nu=$   
 93 9.44 GHz, microwave power of 0.77 mW, modulation amplitude of 10.0 G and field sweep of 1200 G.  
 94 Resulting fitting parameters:  $\text{NH}_2\alpha\text{-Syn-Cu(II)}$ :  $g_{\perp} = 2.06$ ,  $g_{\parallel} = 2.28$ ,  $A_{\parallel} = 168$  G;  $\text{NAC}\alpha\text{-Syn-Cu(II)}$ :  $g_{\perp} = 2.06$ ,  
 95  $g_{\parallel} = 2.28$ ,  $A_{\parallel} = 157$  G; lipids- Cu(II):  $g_{\perp} = 2.07$ ,  $g_{\parallel} = 2.33$ ,  $A_{\parallel} = 150$  G.

96

97

98

99

100

101

102

103

104

105

106

107

108

109

110

111

112

113

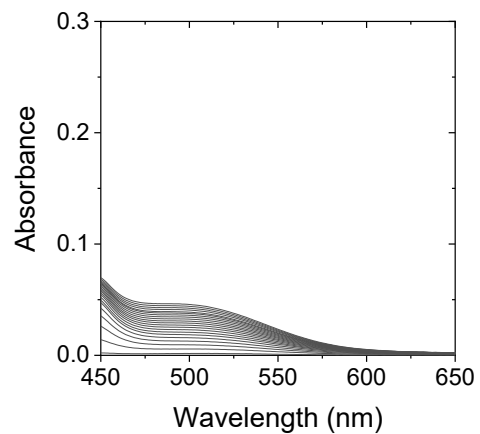

114  
115 **Figure S4.** Dopamine (1 mM) auto-oxidation in 20 mM N-ethylmorpholine/100 mM NaCl, pH 7.4  
116 determined in the presence MBTH (2 mM, 100 min, 25°C).

117  
118  
119  
120  
121  
122  
123  
124  
125  
126  
127  
128  
129  
130  
131  
132  
133  
134  
135  
136  
137  
138  
139  
140

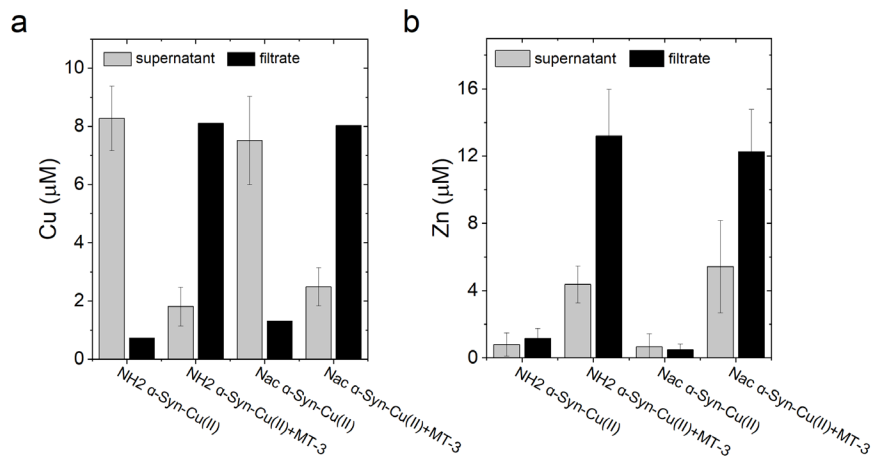

141  
 142 **Figure S5.** ICP-MS copper and zinc quantification after reaction (1 h, 25°C) between membrane-bound α-  
 143 Syn-Cu(II) (10 µM) and Zn<sub>7</sub>MT-3 (2.5 µM), upon separation of membrane-bound α-Syn in the supernatant  
 144 (gray bar) from MT-3 in the filtrate (black bar) using 50-kDa MWCO filters.

145  
 146  
 147  
 148  
 149  
 150  
 151  
 152  
 153  
 154  
 155  
 156  
 157  
 158  
 159  
 160  
 161  
 162  
 163  
 164  
 165  
 166  
 167  
 168  
 169  
 170  
 171  
 172  
 173

174 **Table S1.** ICP-MS quantification of Cu(II) binding (10  $\mu$ M) to soluble or membrane-bound <sup>NH<sub>2</sub></sup> $\alpha$ -Syn or <sup>NAC</sup> $\alpha$ -  
175 Syn (12  $\mu$ M), using 3-kDa or 50-kDa MWCO filters, respectively, to separate unbound Cu(II) before  
176 analysis.  
177

|                                             | % of total Cu    |                 |
|---------------------------------------------|------------------|-----------------|
|                                             | supernatant      | filtrate        |
| <sup>NH<sub>2</sub></sup> $\alpha$ -Syn     | 99.88 $\pm$ 6.11 | 0.12 $\pm$ 0.12 |
| <sup>NAC</sup> $\alpha$ -Syn                | 97.71 $\pm$ 1.69 | 2.29 $\pm$ 0.36 |
| mem <sup>NH<sub>2</sub></sup> $\alpha$ -Syn | 97.26 $\pm$ 1.97 | 2.74 $\pm$ 0.33 |
| mem <sup>NAC</sup> $\alpha$ -Syn            | 96.98 $\pm$ 0.81 | 3.02 $\pm$ 0.35 |
| lipids only                                 | 92.49 $\pm$ 5.60 | 7.51 $\pm$ 7.89 |

178  
179  
180  
181  
182  
183  
184  
185  
186  
187  
188  
189  
190  
191  
192  
193  
194  
195  
196  
197  
198  
199  
200  
201  
202  
203  
204  
205  
206  
207  
208

209 **Table S2.** Retention volumes and peak areas for soluble and membrane-bound <sup>NH2</sup>α-Syn or <sup>NAC</sup>α-Syn (15  
210 μM) after size exclusion chromatography analysis using a Superdex 200 column.  
211

|                               | Retention volume (ml) | Area under peak (ml*mAU) |
|-------------------------------|-----------------------|--------------------------|
| <sup>NH2</sup> α-Syn          | 13.36                 | 21.83                    |
| <sup>NH2</sup> α-Syn + lipids | 12.52                 | 2.36                     |
| <sup>NAC</sup> α-Syn          | 13.23                 | 19.54                    |
| <sup>NAC</sup> α-Syn + lipids | 13.21                 | 1.74                     |

212  
213  
214  
215  
216  
217  
218  
219  
220  
221  
222  
223  
224  
225  
226  
227  
228  
229  
230  
231  
232  
233  
234  
235  
236  
237  
238  
239  
240  
241  
242  
243  
244



245 **Table S3.** Michaelis-Menten analysis of the dopamine oxidase activity for membrane-bound <sup>NAc</sup>α-Syn in  
246 20 mM N-ethylmorpholine/100 mM NaCl, pH 7.4 in the presence of increasing H<sub>2</sub>O<sub>2</sub> concentrations.  
247 Dopamine oxidation activity was determined after 20 s (25°C) in the presence of MBTH (2 mM).  
248

| H <sub>2</sub> O <sub>2</sub> concentration (M) | V <sub>MAX</sub><br>(nmol quinone*μmol <sup>-1</sup> α-Syn-Cu(II)*min <sup>-1</sup> ) | K <sub>M</sub> (mM) |
|-------------------------------------------------|---------------------------------------------------------------------------------------|---------------------|
| 0.00                                            | 1281.6 ± 63.6                                                                         | 0.29 ± 0.05         |
| 0.05                                            | 1551.6 ± 128.5                                                                        | 0.10 ± 0.02         |
| 0.10                                            | 1880.2 ± 104.5                                                                        | 0.11 ± 0.01         |
| 0.25                                            | 1873.3 ± 44.3                                                                         | 0.05 ± 0.00         |
| 0.50                                            | 1970.2 ± 104.2                                                                        | 0.06 ± 0.01         |
| 1.00                                            | 2044.78 ± 39.56                                                                       | 0.12 ± 0.01         |

249  
250  
251  
252  
253  
254  
255  
256  
257  
258  
259  
260  
261  
262  
263  
264  
265  
266  
267  
268  
269  
270  
271  
272  
273  
274  
275

276 **Table S4.** Low-temperature luminescence lifetimes of the 425 nm and 575 nm bands recorded on the  
277 reaction products between soluble or membrane-bound <sup>NH<sub>2</sub></sup>α-Syn-Cu(II) or <sup>N<sup>Ac</sup></sup>α-Syn-Cu(II) (10 μM) and  
278 Zn<sub>7</sub>MT-3 (2.5 μM), reacted for 1 h at 25°C.

279  
280  
281  
282  
283  
284  
285  
286  
287  
288  
289  
290  
291  
292  
293  
294  
295  
296

|                                                                   | Lifetime (μs) |        |
|-------------------------------------------------------------------|---------------|--------|
|                                                                   | 425 nm        | 575 nm |
| Cu <sub>4</sub> Zn <sub>4</sub> MT-3                              | 41.5          | 118.5  |
| <sup>NH<sub>2</sub></sup> α-Syn-Cu(II) + Zn <sub>7</sub> MT-3     | 41.4          | 121.3  |
| <sup>N<sup>Ac</sup></sup> α-Syn-Cu(II) + Zn <sub>7</sub> MT-3     | 43.0          | 117.5  |
| mem <sup>NH<sub>2</sub></sup> α-Syn-Cu(II) + Zn <sub>7</sub> MT-3 | 39.8          | 111.7  |
| mem <sup>N<sup>Ac</sup></sup> α-Syn-Cu(II) + Zn <sub>7</sub> MT-3 | 40.4          | 116.8  |
